# Supplementary material for: Outcomes of High-Grade Cervical Dysplasia with Positive Margins and HPV Persistence after Cervical Conization
Source: MDPI journal article supplement (doi:10.3390/vaccines11030698), 2023-03-18
Supplement: s1 [file s1]

**Table S1.** Severity of the lesion: CIN2 vs. CIN3.

|                                 | <b>CIN 2 (n=61)</b> | <b>CIN 3 (n=102)</b> | <b>p value</b> |
|---------------------------------|---------------------|----------------------|----------------|
| Age                             | 42.4 (26-61)        | 43 (74-20)           | 0.763          |
| BMI                             | 22.8 (19-33)        | 26.1 (42-18,4)       | <0.001         |
| HPV type                        |                     |                      |                |
| HPV 16/18                       | 21 (34.4%)          | 52 (50.9 %)          | 0.039          |
| Others HR-HPV                   | 4 (6.5%)            | 25 (24.5 %)          | 0.003          |
| LR-HPV & Unknown                | 36 (59%)            | 25 (24.5 %)          | <0.001         |
| LEEP                            | 60 (98.3%)          | 101 (99 %)           | 0.711          |
| LASER                           | 1 (0.7%)            | 1 (1%)               | 0.711          |
| Ectocervical positive margins   | 54 (88.5%)          | 65 (63.7%)           | <0.001         |
| Endocervical positive margins   | 7 (11.5%)           | 37 (36.3%)           | <0.001         |
| HPV persistence                 | 61 (100%)           | 102 (100%)           | 1.00           |
| HPV vaccination after treatment | 10 (16.3%)          | 15 (14.7%)           | 0.772          |
| Recurrence                      | 2 (3.2%)            | 15 (14.7%)           | 0.020          |

**Table S2.** Positive surgical margins: ectocervical vs. endocervical.

|                                 | <b>Positive ectocervical<br/>margins (n=119)</b> | <b>Positive<br/>endocervical<br/>margins (n=44)</b> | <b>p value</b> |
|---------------------------------|--------------------------------------------------|-----------------------------------------------------|----------------|
| Age                             | 42.68 (24-74)                                    | 43.43 (20-63)                                       | 0.7117         |
| BMI                             | 23.61 (18.4-42)                                  | 27.22 (19-42)                                       | <0.001         |
| HPV type                        |                                                  |                                                     |                |
| HPV 16/18                       | 44 (36.9%)                                       | 29 (65.9%)                                          | 0.001          |
| Others HR-HPV                   | 19 (15.9%)                                       | 10 (22.7%)                                          | 0.316          |
| LR-HPV & Unknown                | 56 (47%)                                         | 5 (11.3%)                                           | <0.001         |
| LEEP                            | 118 (99.1%)                                      | 44 (100%)                                           | 0.5419         |
| LASER                           | 1 (0.9%)                                         | 0 (0 %)                                             | 0.5419         |
| CIN 2                           | 54 (45.3%)                                       | 7 (15.9%)                                           | <0.001         |
| CIN 3                           | 65 (54.6%)                                       | 37 (84%)                                            | <0.001         |
| HPV persistence                 | 119 (100%)                                       | 44 (100%)                                           | 1.00           |
| HPV vaccination after treatment | 9 (7.5%)                                         | 6 (13.6%)                                           | 0.235          |
| Recurrence                      | 6 (5%)                                           | 12 (27.2%)                                          | <0.001         |

**Table S3.** HPV16/18 vs. other high-risk HPV positivity.

|                               | <b>HPV16/18 positivity<br/>(n=73)</b> | <b>Other high-risk HPV<br/>positivity (n=28)</b> | <b>p value</b> |
|-------------------------------|---------------------------------------|--------------------------------------------------|----------------|
| Age                           | 41.86 (20-62)                         | 42.57 (25-63)                                    | 0.797          |
| BMI                           | 24.61 (18.4-35)                       | 23.28 (21-26)                                    | 0.156          |
| CIN 2                         | 21 (28.7 %)                           | 3 (10.7%)                                        | 0.056          |
| CIN 3                         | 52 (71.2%)                            | 25 (89.2%)                                       | 0.056          |
| LEEP                          | 73 (100%)                             | 28 (100%)                                        |                |
| LASER                         | 0 (0 %)                               | 0 (0%)                                           | 0.999          |
| Exocervical positive margins  | 44 (60.2%)                            | 18 (64.2%)                                       | 0.710          |
| Endocervical positive margins | 29 (39.7%)                            | 10 (35.7%)                                       | 0.710          |
| HPV persistence               | 73 (100%)                             | 28 (100%)                                        | 1.00           |
| Persistence after 6 months    | 73 (100%)                             | 28 (100%)                                        | 1.00           |
| Recurrence                    | 8 (10.9%)                             | 3 (10.7%)                                        | 0.971          |
